# Supplementary material
Source: ML conference proceedings conference paper supplement (https://openaccess.thecvf.com/content/WACV2023/html/Doukas_Dynamic_Neural_Portraits_WACV_2023_paper.html)
Supplement: Supplementary file 2 [file Doukas_Dynamic_Neural_Portraits_WACV_2023_supplemental.zip]

Archive with 2 entries (2 files):
- supplementary_material.pdf
- supplementary_video.mp4
